# Supplementary material for: Factors affecting health-related quality of life in patients with cervical cancer
Source: Research Square preprint supplement (doi:10.21203/rs.3.rs-8178153/v1), 2025-12-02
Supplement: Supplementary file 1 [file ec5d81a96694587bd1c1e96e.docx]

**Supplementary Table 1.** Institutional review board approval number.

| Hospital | IRB Approval Number |
| --- | --- |
| Seoul National University Hospital | 2307-198-1454 |
| Inje University Busan Paik Hospital | 2023-07-018 |
| CHA Bundang Medical Center | 2023-08-014 |
| Korea University Ansan Hospital | 2023AS0208 |
| Konkuk University Medical Center | KUMC 2023-09-038-001 |
| Severance Hospital (Sinchon) | 4-2023-0719 |
| Seoul St. Mary’s Hospital | KC23QNDI0625 |
| Ajou University Hospital | AJOUIRB-SB-2023-433 |
| Hallym University Kangnam Sacred Heart Hospital | HKS 2023-08-017 |
| Kyung Hee University Hospital | 2023-08-002-006 |
| Korea University Guro Hospital | 2023GR0339 |
| Hanyang University Medical Center | 2023-08-009-012 |
